# Supplementary material for: SHIPS: Spectral Hierarchical Clustering for the Inference of Population Structure in Genetic Studies
Source: PubMed Central journal article supplement (PMC3470591; doi:10.1371/journal.pone.0045685), 2012-10-12
Supplement: pone.0045685.s003.pdf [file pone.0045685.s003.pdf]

| Model                          | Samples per sub-population |
|--------------------------------|----------------------------|
| Model M1 (1 sub-population)    | 100                        |
| Model M3 (3 sub-populations)   | 100                        |
| Model M5 (5 sub-populations)   | 50                         |
| Model M10 (10 sub-populations) | 50                         |
| Model M20 (20 sub-populations) | 30                         |

Details of the simulated models
