# Supplementary material for: SHIPS: Spectral Hierarchical Clustering for the Inference of Population Structure in Genetic Studies
Source: PubMed Central journal article supplement (PMC3470591; doi:10.1371/journal.pone.0045685), 2012-10-12
Supplement: pone.0045685.s004.pdf [file pone.0045685.s004.pdf]

| Population         | # Samples |
|--------------------|-----------|
| CEU                | 112       |
| CHB                | 137       |
| Admixed (names XY) | 100       |

Details of the admixed dataset
