# Supplementary material for: SHIPS: Spectral Hierarchical Clustering for the Inference of Population Structure in Genetic Studies
Source: PubMed Central journal article supplement (PMC3470591; doi:10.1371/journal.pone.0045685), 2012-10-12
Supplement: pone.0045685.s005.pdf [file pone.0045685.s005.pdf]

| Population | Ethnicity                                                  | # Samples |
|------------|------------------------------------------------------------|-----------|
| CEU        | Utah residents with Northern and Western European ancestry | 112       |
| CHB        | Han Chinese in Beijing, China                              | 137       |
| CHD        | Chinese in Metropolitan Denver, Colorado                   | 109       |
| GIH        | Gujarati Indians in Houston, Texas                         | 101       |
| JPT        | Japanese in Tokyo, Japan                                   | 113       |
| LWK        | Luhya in Webuye, Kenya                                     | 110       |
| MKK        | Maasai in Kinyawa, Kenya                                   | 156       |
| TSI        | Toscani in Italia                                          | 102       |
| YRI        | Yoruba in Ibadan, Nigeria                                  | 147       |

Details of the HapMap dataset
