# Supplementary material for: SHIPS: Spectral Hierarchical Clustering for the Inference of Population Structure in Genetic Studies
Source: PubMed Central journal article supplement (PMC3470591; doi:10.1371/journal.pone.0045685), 2012-10-12
Supplement: pone.0045685.s007.pdf [file pone.0045685.s007.pdf]

| Data / Model | M1 | M3 | M5 | M10 | M20 | Madx | HapMap | Pan-Asian |
|--------------|----|----|----|-----|-----|------|--------|-----------|
| Small data   | 0  | 17 | 12 | 51  | 72  | 9    | 49     | 64        |
| Large data   | 0  | 6  | 5  | 28  | 49  | 25   | 70     | 99        |

Number of PCs selected with PCAclust
