# Supplementary material for: SHIPS: Spectral Hierarchical Clustering for the Inference of Population Structure in Genetic Studies
Source: PubMed Central journal article supplement (PMC3470591; doi:10.1371/journal.pone.0045685), 2012-10-12
Supplement: pone.0045685.s023.pdf [file pone.0045685.s023.pdf]

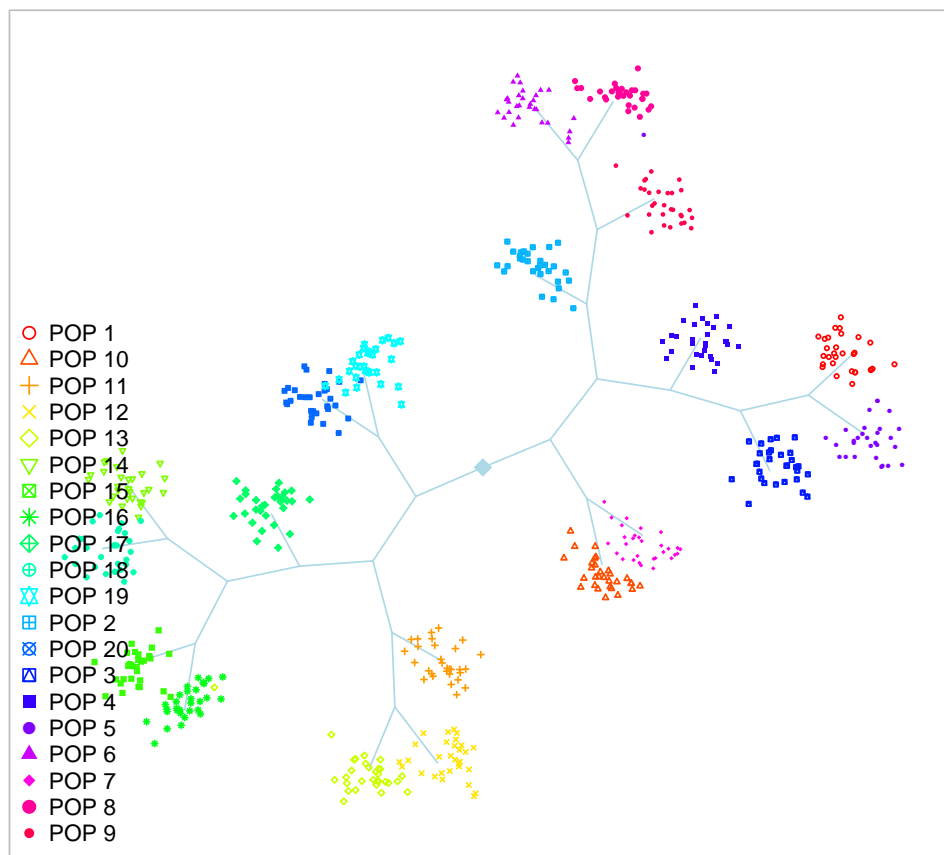

**SHIPS tree of the model M20 (large dataset)** The colored populations correspond to the population labels and not the estimated clusters.
