# Supplementary material for: SHIPS: Spectral Hierarchical Clustering for the Inference of Population Structure in Genetic Studies
Source: PubMed Central journal article supplement (PMC3470591; doi:10.1371/journal.pone.0045685), 2012-10-12
Supplement: pone.0045685.s026.pdf [file pone.0045685.s026.pdf]

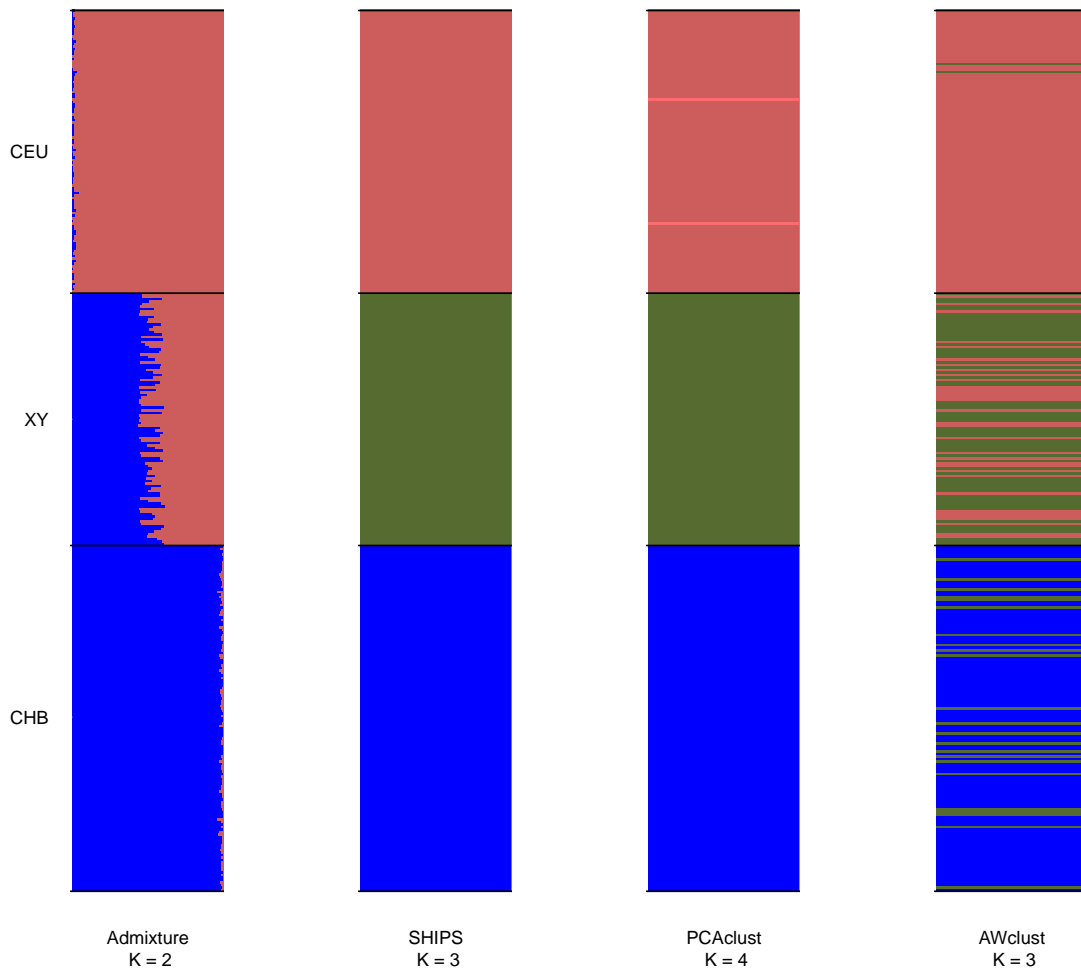

**Barplots of the admixture proportions for the large admixed data.** Populations are separated by black lines and assigned with a unique color that is approximately reported on the barplot of each method. For the discrete methods the admixture proportions are either 0 or 1.
