# Supplementary material for: SHIPS: Spectral Hierarchical Clustering for the Inference of Population Structure in Genetic Studies
Source: PLoS One. 2012 Oct 12;7(10):e45685. doi: 10.1371/journal.pone.0045685 (PMC3470591; doi:10.1371/journal.pone.0045685)
Supplement: Table S4 — Details of the Pan-Asian datasets. (PDF) [file pone.0045685.s006.pdf]

| Population | Ethnicity                 | # Samples |
|------------|---------------------------|-----------|
| CN.WA      | Wa, China                 | 56        |
| ID.JA      | Javanese, Indonesia       | 34        |
| IN.TB      | Mongoloid features, India | 23        |
| JP.ML      | Japanese ,Japan           | 71        |
| KR.KR      | Koreans, Korea            | 90        |
| MY.JH      | Negrito, Malaysia         | 50        |
| PI.AT      | Ati, Philippines          | 23        |
| SG.ID      | Indian, Singapore         | 30        |
| TH.MA      | Mlabri, Thailand          | 18        |
| TW.HA      | Chinese, Taiwan           | 48        |

Details of the Pan-Asian dataset
